# Supplementary material
Source: publisher figshare collection journal article supplement (https://tandf.figshare.com/ndownloader/files/22172643)
Supplement: Supplementary file 1 [file 22172643]

## Technical Appendix A: Green Infrastructure and Park Elements in Florida Counties' Mitigation and Post-Development Redevelopment Plans

| COUNTY                                                                                           | Coastal | Pop       | Mitigation plan year | Mentions Natural    | Environmental Rating** | Mentions Recreation or | Post-disaster Redevelopment Plan (PDRP) year | PDRP Environmental /Greenspace Element |
|--------------------------------------------------------------------------------------------------|---------|-----------|----------------------|---------------------|------------------------|------------------------|----------------------------------------------|----------------------------------------|
|                                                                                                  |         |           |                      | Resource Mitigation |                        | Quality of Life        |                                              |                                        |
| Alachua                                                                                          |         | 263,291   | 2015                 |                     | 2                      |                        | 2010                                         | x                                      |
| Baker                                                                                            |         | 27,652    | 2015                 | x                   | 1                      | x                      |                                              |                                        |
| Bay                                                                                              | x       | 181,199   | 2009                 |                     | 2                      |                        | 2008                                         | x                                      |
| Bradford                                                                                         |         | 28,057    | 2015                 |                     | 0                      |                        |                                              |                                        |
| Brevard                                                                                          | x       | 583,563   | 2015                 |                     | 0                      |                        |                                              |                                        |
| Broward                                                                                          | x       | 1,897,976 | 2012                 |                     | 0                      |                        |                                              |                                        |
| Charlotte                                                                                        | x       | 177,987   | 2015                 | x                   | 2                      |                        |                                              |                                        |
| Citrus                                                                                           | x       | 145,721   | 2015                 | x                   | 1                      |                        |                                              |                                        |
| Collier                                                                                          | x       | 367,347   | 2015                 | x                   | 2                      |                        |                                              |                                        |
| Columbia                                                                                         |         | 69,721    | 2015                 |                     | 0                      |                        |                                              |                                        |
| DeSoto                                                                                           |         | 35,520    | 2015                 |                     | 0                      |                        |                                              |                                        |
| Dixie                                                                                            | x       | 16,489    | 2010                 | x                   | 1                      |                        |                                              |                                        |
| Duval                                                                                            | x       | 952,861   | 2015                 | x                   | 2                      |                        | 2012                                         | x                                      |
| Escambia                                                                                         | x       | 318,560   | 2015                 |                     | 1                      |                        |                                              |                                        |
| Flagler                                                                                          | x       | 107,511   | 2016                 | x                   | 1                      |                        |                                              |                                        |
| Franklin                                                                                         | x       | 12,009    | 2016                 | x                   | 1                      | x                      |                                              |                                        |
| Gadsden                                                                                          |         | 47,828    | 2010                 | x                   | 1                      |                        |                                              |                                        |
| Gilchrist                                                                                        |         | 17,424    | 2016                 |                     | 2                      |                        |                                              |                                        |
| Glades                                                                                           |         | 13,002    | 2016                 |                     | 0                      |                        |                                              |                                        |
| Gulf                                                                                             | x       | 16,499    | 2015                 | x                   | 1                      | x                      |                                              |                                        |
| Hamilton                                                                                         |         | 14,621    | 2018                 |                     | 0                      |                        |                                              |                                        |
| Hardee                                                                                           |         | 27,296    | 2015                 | x                   | 2                      |                        |                                              |                                        |
| Hendry                                                                                           |         | 39,586    | 2015                 | x                   | 3                      |                        |                                              |                                        |
| Hernando                                                                                         | x       | 185,604   | 2015                 |                     | 1                      |                        | 2012                                         |                                        |
| Highlands                                                                                        |         | 102,525   | 2015                 |                     | 0                      |                        |                                              |                                        |
| Hillsborough                                                                                     | x       | 1,408,864 | 2015                 | x                   | 2                      |                        | 2010                                         | x                                      |
| Indian River                                                                                     | x       | 151,825   | 2015                 | x                   | 3                      |                        |                                              |                                        |
| Jackson                                                                                          |         | 50,435    | 2011                 | x                   | 1                      |                        |                                              |                                        |
| Jefferson                                                                                        | x       | 14,733    | 2015                 | x                   | 1                      |                        |                                              |                                        |
| Lafayette                                                                                        |         | 8,501     | 2013                 |                     | 0                      |                        |                                              |                                        |
| Lake                                                                                             |         | 342,917   | 2016                 |                     | 0                      |                        |                                              |                                        |
| Lee                                                                                              | x       | 713,903   | 2017                 | x                   | 2                      |                        |                                              |                                        |
| Leon                                                                                             |         | 292,332   | 2017                 |                     | 0                      | x                      | 2012                                         |                                        |
| Levy                                                                                             | x       | 41,054    | 2016                 | x                   | 3                      |                        |                                              |                                        |
| Liberty                                                                                          |         | 8,915     | n/a                  |                     | 0                      |                        |                                              |                                        |
| Madison                                                                                          |         | 19,473    | 2015                 | x                   | 1                      |                        |                                              |                                        |
| Manatee                                                                                          | x       | 377,826   | 2014                 |                     | 3                      |                        | 2009                                         | x                                      |
| Marion                                                                                           |         | 353,898   | 2016                 |                     | 0                      |                        |                                              |                                        |
| Martin                                                                                           | x       | 155,556   | 2015                 | x                   | 3                      |                        |                                              |                                        |
| Miami-Dade                                                                                       | x       | 2,779,322 | 2017                 | x                   | 3                      |                        |                                              |                                        |
| Monroe                                                                                           | x       | 73,940    | 2015                 |                     | 3                      | x                      | 2010                                         | x                                      |
| Nassau                                                                                           | x       | 82,748    | 2016                 | x                   | 3                      |                        |                                              |                                        |
| Okaloosa                                                                                         | x       | 198,152   | 2016                 |                     | 0                      |                        |                                              |                                        |
| Orange                                                                                           |         | 1,349,597 | 2016                 | x                   | 2                      |                        |                                              |                                        |
| Osceola                                                                                          |         | 352,496   | 2015                 |                     | 1                      |                        |                                              |                                        |
| Palm Beach                                                                                       | x       | 1,433,417 | 2015                 |                     | 3                      |                        | 2012                                         | x                                      |
| Pasco                                                                                            | x       | 515,077   | 2014                 |                     | 3                      | x                      | 2016                                         | x                                      |
| Pinellas                                                                                         | x       | 970,532   | 2015                 | x                   | 2                      |                        | 2009                                         | x                                      |
| Polk                                                                                             |         | 673,028   | 2015                 | x                   | 2                      |                        | 2009                                         |                                        |
| Putnam                                                                                           |         | 72,981    | 2015                 | x                   | 1                      |                        |                                              |                                        |
| Santa Rosa                                                                                       | x       | 174,887   | 2016                 | x                   | 1                      |                        |                                              |                                        |
| Sarasota                                                                                         | x       | 417,442   | 2016                 | x                   | 3                      | x                      | 2015                                         | x                                      |
| Seminole                                                                                         |         | 463,560   | 2015                 |                     | 0                      |                        |                                              |                                        |
| St. Johns                                                                                        | x       | 238,742   | 2015                 | x                   | 2                      | x                      |                                              |                                        |
| St. Lucie                                                                                        | x       | 302,432   | 2015                 | x                   | 2                      |                        | 2012                                         |                                        |
| Sumter                                                                                           |         | 124,935   | 2015                 |                     | 0                      |                        |                                              |                                        |
| Suwannee                                                                                         |         | 44,879    | 2010                 | x                   | 1                      |                        |                                              |                                        |
| Taylor                                                                                           | x       | 22,283    | 2015                 | x                   | 1                      |                        |                                              |                                        |
| Volusia                                                                                          | x       | 531,062   | 2015                 |                     | 1                      |                        | 2015                                         |                                        |
| Wakulla                                                                                          | x       | 31,943    | 2016                 | x                   | 3                      | x                      |                                              |                                        |
| Walton                                                                                           | x       | 67,656    | 2015                 | x                   | 0                      |                        | 2012                                         | x                                      |
| Washington                                                                                       |         | 25,129    | 2016                 |                     | 0                      |                        |                                              |                                        |
| * Plans gathered between Nov 2018 and Feb 2019                                                   |         |           |                      |                     |                        |                        |                                              |                                        |
| ** Environmental rating: 1 mentions conservation, 2 mentions restoration, 3 mentions enhancement |         |           |                      |                     |                        |                        |                                              |                                        |

## Technical Appendix B: Definitions

- Four phases of emergency management: Preparedness, response, recovery, mitigation
  - Recovery: Actions take to return to normal after disaster
  - Mitigation: Activities that prevent or reduce risk from hazard
- Adaptation: Changes made to respond to new conditions and take advantage of opportunities
- Resilience: Ability of a system or community to resist, absorb, recover, and adapt to the effects of a hazard
- Double dividend: Idea that greenspaces can be used for ecological, hazard mitigation, and human health benefits
- Green infrastructure (GI): interconnected network of greenspace that serves for ecosystem and human services
  - Greenspace: Vegetated open space, usually in an urban area
  - Park: land, usually “natural”/vegetated used for the enjoyment of the public

Adopted and adapted from FEMA, n.d.

## Reference

**Federal Emergency Management Agency (FEMA).** (n.d.). *Emergency management in the United States*. Retrieved from [https://training.fema.gov/emiweb/downloads/is111\\_unit%204.pdf](https://training.fema.gov/emiweb/downloads/is111_unit%204.pdf)
